# Supplementary material for: Frequency and intensity of nitrogen addition alter soil inorganic sulfur fractions but the effects vary with mowing management in a temperate steppe
Source: Copernicus journal article supplement (doi:10.5194/bg-2018-526), 2019-02-01
Supplement: Supplementary file 1 [file bg-2018-526-supplement.pdf]

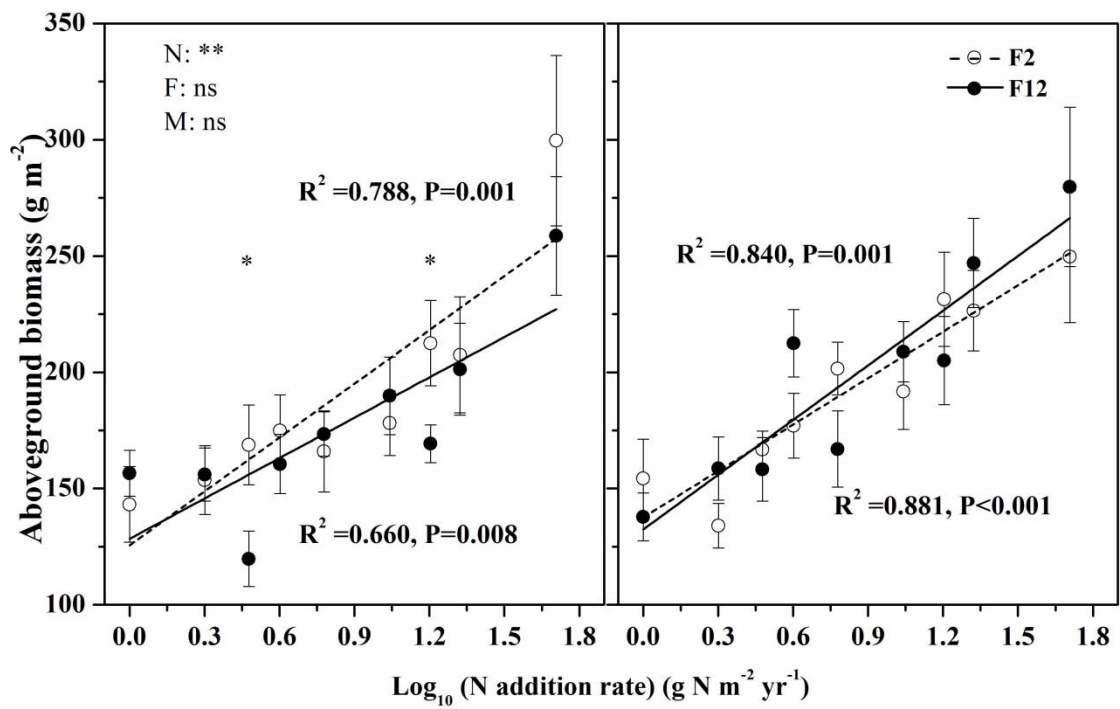

**Figure S1** Effect of N addition intensity and frequency on aboveground biomass in un-mown (a) and mown plots (b). Dashed and solid regression lines correspond to 2 and 12 N additions year<sup>-1</sup>, respectively. Error bars indicate standard error. Asterisks indicate significant difference between low and high frequency of N addition within one N addition rate and mowing management.

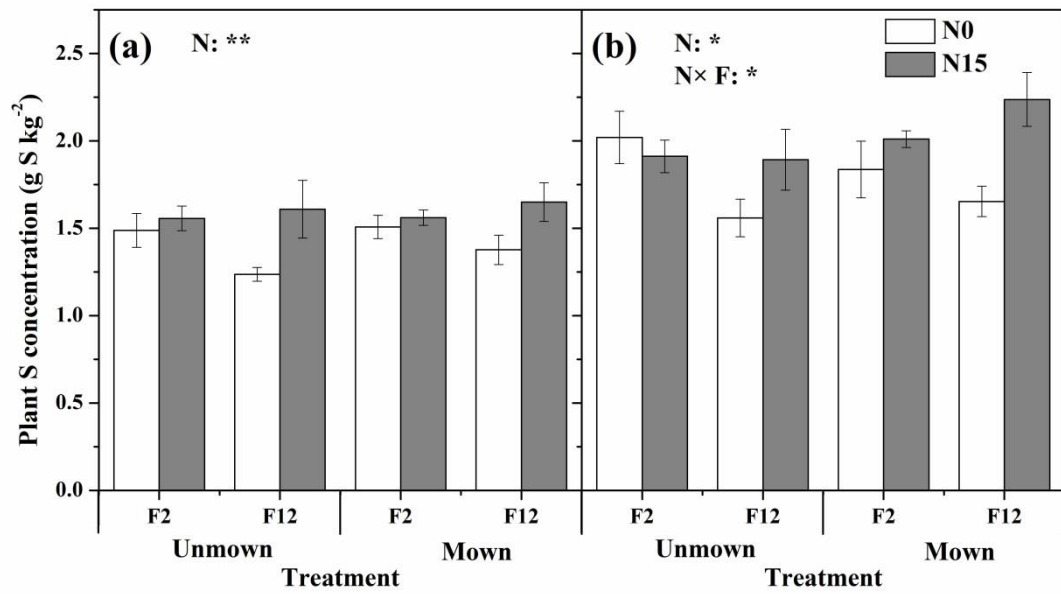

**Figure S2** Effect of N addition intensity and frequency on plant S concentration in dominant species of *Leymus chinensis* (a) and *Stipa grandis* (b) without and with mowing (only plant samples in 0 and 15 g N m<sup>-2</sup> year<sup>-1</sup> were measured). Error bars indicate standard error. \* and \*\* represent significance levels ( $P \leq 0.05$  and 0.01, respectively).

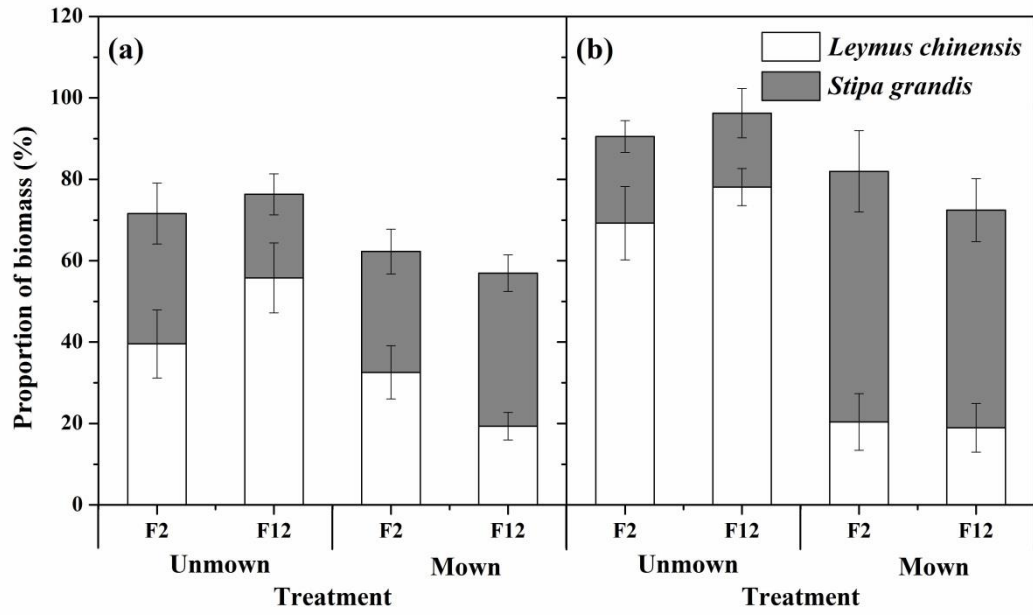

**Figure S3** Effect of N addition intensity and frequency on biomass proportion of dominant species of *Leymus chinensis* and *Stipa grandis* without and with mowing (only plant samples in 0 (a) and 15 (b) g N m<sup>-2</sup> year<sup>-1</sup> were measured). Error bars indicate standard error.
