# Supplementary material for: Frequency and intensity of nitrogen addition alter soil inorganic sulfur fractions but the effects vary with mowing management in a temperate steppe
Source: Copernicus journal article supplement (doi:10.5194/bg-2018-526), 2019-02-01
Supplement: Supplementary file [file bg-2018-526-AC1-supplement.pdf]

We sincerely thank the reviewer for the constructive comments and suggestions, which helped us to substantially improve our manuscript. Please find the point-to-point responses (blue) to the comments (black) as listed below.

**Reviewer #1:**

**General comment:** This paper investigated the effect of N loads on S dynamics in grassland soil and shows interesting topics. However, there are some concerns especially for data analysis. For example, the authors defined total inorganic S as HCl extractable S + PO<sub>4</sub> extractable S. But, these fractions would highly overlap each other (See below comments). Therefore, the authors should re-analyze and revise related data and discussion. After the revision, further review on discussions is needed.

Response: We agree with the comment and feel sorry for the confusion caused by our way of defining soil inorganic S fractions. Following your suggestion, we clarified the definition of each inorganic S fraction and re-analyzed the data. They were clarified as “Water-soluble S, available S and total inorganic S were extracted with 0.01 M CaCl<sub>2</sub>, 0.01 M Ca(H<sub>2</sub>PO<sub>4</sub>)<sub>2</sub> and 1 M HCl at a 5:1 (w/v) water: soil ratio, respectively (Roberts and Bettany, 1985) (P.11 L11-14)”. We listed the equations for calculating adsorbed S, total inorganic S and organic S concentrations (P.12 L1-5). All the related statistical analyses, including tables and figures and the discussion were updated.

**Specific comments:**

1. P.2 L11-13: This sentence is misleading because the concentrations of water-soluble S and adsorbed S did not always increase with N intensity. This sentence would be integrated with L17-20 and described accurately

Response: Thanks for the suggestion. We corrected the description by integrating the two sentences into ‘Generally, N addition frequency, N intensity and mowing significantly interacted with each other to affect most of inorganic S fractions. Specifically, the significant increase of water-soluble S was only found at high N frequency with the increasing intensity of N addition. Increasing N addition intensity enhanced adsorbed S and available S concentrations at low N frequency in unmown plots; however, both fractions significantly increased with N intensity at both N frequencies in mown plots’ (P.2 L11-17).

2. P.5 L2: Bobbink et al., 2010 is not listed in reference section.

Response: Added in the reference section. Please see P.26 L17.

3. P.6 L9: Is mowing really common in temperate grasslands of the world? You should add a reference to support this sentence.

Response: Yes, mowing is common in temperate grasslands. It is one of the oldest and

most widespread practices in grassland management to produce hay, which can be stored for on-farm/agricultural use. As suggested, references were added (P.6 L16).

*Bremer, D. J., and Ham, J. M.: Measurement and modeling of soil CO<sub>2</sub> flux in a temperate grassland under mowed and burned regimes. Ecol. Appl., 12, 1318-1328, [https://doi.org/10.1890/1051-0761\(2002\)012\[1318:MAMOSC\]2.0.CO;2](https://doi.org/10.1890/1051-0761(2002)012[1318:MAMOSC]2.0.CO;2), 2002.*

*Zhang, Y., Loreau, M., He, N., Zhang, G., and Han, X.: Mowing exacerbates the loss of ecosystem stability under nitrogen enrichment in a temperate grassland, *Funct. Ecol.*, 31, 1637-1646, <https://doi.org/10.1111/1365-2435.12850>, 2017.*

4. P.8 L10-11: The experimental design is interesting. But, readers need to be provided with far more information on the experimental design, how to decide the intensities and frequencies of N addition and what do these correspond to?

Response: More information on the experimental design was provided (P.8 L21-P.9 L1-7). Higher frequency of N addition is to simulate natural N deposition and to determine whether the effect of frequent N addition differs from infrequent N addition as common used to mimic N deposition in manipulative experiments. Higher rates of N addition were used to mimic accumulative N deposition in the long-term and/or extreme N inputs in the future.

5. P.8 L21: Is this sand S free?

Response: The sand used in this experiment is sulfur free and the information was added (P.9 L19-P.10 L1).

6. P.10 L7: Please add a reference.

Response: We added a reference for soil organic carbon measurement (P.11 L3).

7. P.10 L15, 17, 20 21: Mistypes. Please put a space before a unit.

Response: These mistypes have been corrected (P.11 L14, L16, L18 L21).

8. P.10 L20: What is the concentrations of H<sub>2</sub>O<sub>2</sub>? Does this method include extracted organic S into inorganic S?

Response: The concentration of H<sub>2</sub>O<sub>2</sub> is 30% (P.11 L16). This method does not include extracted organic S into inorganic S because the presence of Ca<sup>2+</sup> in the extractants depresses the solubility of organic matter (P.11 L16-18) including organic S. Therefore, the BaCl<sub>2</sub>-turbidimetry only determines sulfate ion (SO<sub>4</sub><sup>2-</sup>) extracted from inorganic S fractions.

9. P10 L21: What is acacia solution?

Response: Sorry, it is gum acacia solution, which helps stabilize the suspension (P.11 L19).

10. P11 L3-4: According to Roberts and Bettany, 1985, which you cited, total inorganic S was defined as HCl-extractable S and insoluble inorganic S was HCl-extractable S – water-soluble S. HCl solution can extract both water-soluble S and adsorbed S by dissolving clay minerals. It would be better that total inorganic S was defined as HCl-extractable S and insoluble inorganic S was HCl-extractable S – available S.

Response: Thanks for the helpful suggestion. We agree with the point that HCl can extract both water-soluble S and adsorbed S. As suggested, we recalculated the data by defining total inorganic S as HCl-extractable S (P.11 L12-13) and insoluble S as HCl-extractable S – available S (P.12 L4). We updated all the related statistics including the tables and figures accordingly.

11. P.11 L9: Please add a reference.

Response: Added as suggested (P.12 L10).

12. P.11 L15: Although you did several statistical analyses, have you been checked by an expert on statistical analysis? I'm not sure these analyses are right. However, at least for the SEM model, it would be necessary to describe which data set is used for, what the initial model is and how to select the paths from the model. Is Duncan's HSD (I'm sorry but I don't know this method. Is it same to Duncan's multiple range test?) available for proportional data?

Response: We carefully checked our statistical analyses and consulted an expert on statistical analysis to make sure these are right. More information about the SEM model were provided: 1) the dataset that we used for running the SEM model were described in the main text (P.13 L20); 2) we added the information of what the initial model is and how to select the paths from the model (P.13 L21-P.14 L5 and caption of Fig S1). We employed Duncan's multiple range test (P.13 L6) instead of Duncan's HSD (sorry for the typo) for analyzing proportional data.

13. P.12 L14: When using R, you should add a reference of "R core team".

Response: As suggested, the reference of "R core team" were provided in P.13 L15.

14. P.18 L19 - P.19 L6: Do you have an idea why adsorbed S concentration in unmown plots at high frequency didn't increase with changes in soil pH?

Response: At high N frequency, unaffected adsorbed S in unmown plots could be possibly due to the fact that soil pH tended to be higher as compared to low N frequency at the same N addition level (statistically significant at 10, 15 and 20 g N m<sup>-2</sup> yr<sup>-1</sup>, see Table 1). Moreover, soil pH decreased at a much lower rate along with

increasing N addition intensity (significant decrease only detected at 20 and 50 g N m<sup>-2</sup> yr<sup>-1</sup>) under high N frequency comparing to low N frequency. This resulted in weaker S adsorption strength, less SO<sub>4</sub><sup>2-</sup> release from insoluble S dissolution and consequently non-significant increase of adsorbed S concentration with increasing N intensity at high N frequency. This explanation has been added (P.19 L19-P.20 L6).

15. P.19 L14-15: Unclear.

Response: As suggested, we clarified the statement into “*Moreover, decrease of soil pH and higher plant S uptake under N input (Fig. 5) could promote biochemical mineralization of organic S via enhancing secretion of arylsulfatase by soil microorganisms (McGill and Cole, 1981). This further confirmed with Niknahad et al. (2009) reporting the upregulation of soil organic S mineralization by decrease of soil pH*” (P.21 L14-19).

16. P.19 L19-21: How to conclude this? Soil available S is affected by various factors such as mineralization rate, plant uptake, amount of adsorption material and soil chemistry. More detailed explanation is needed.

Response: Thanks for the helpful suggestion. As per suggestion, we provided detailed explanation by relating to factors of soil chemistry (soil pH decline and insoluble S dissolution), mineralization, leaching and plant S uptake (P.22 L9-P.23 L2). The explanation was written as “*A sharper decrease of soil pH with low N frequency relative to high N frequency was expected to result in higher soil available S concentration via enhanced insoluble S dissolution. In contrary, lower available S concentration was found under low N frequency as compared to high N frequency, which could be possibly driven by higher plant S uptake (Fig. 5) surpassing the amount of S dissolution. Leaching loss of SO<sub>4</sub><sup>2-</sup> was suggested to be evident with infrequent and extreme rainfall pulses in sandy soils (Eriksen and Askegaard, 2000). Therefore, another potential explanation could be that large-pulse water input at low N frequency resulted in higher leaching loss of available S than the high N frequency of adding small-amount water each time. And the results of adsorbed S, available S and total inorganic S in the control plots supported this explanation. With the increase of N intensity, leaching loss of available S was exacerbated due to the fact of enhancing insoluble S dissolution (Fig. 2e,f). Comparing to high N frequency, organic S mineralization did not contribute to lower total inorganic S and available S concentrations at low N frequency for the same N intensity as no difference was detected for organic S concentration between two N frequencies*”.

And we concluded this as “*These results suggest that using low frequency of N addition to mimic N deposition may overestimate the processes of insoluble S dissolution (especially in unmown plots) and plant S uptake in temperate grasslands.*”

*However, some of the S fractions responded differently to both N intensity and frequency with or without mowing treatment suggesting that the effects of N addition strongly depended on mowing practice” (P.23 L2-L7).*

17. P.20 L6-8: When discussing the effect of experimental operation, you should use the results in control plots.

Response: As suggested, we mentioned the results in control plots when discussing the effect of experimental operation (P.22 L17-18). Further, we found leaching loss of available S was exacerbated due to the fact of enhancing insoluble dissolution (P.22 L18-20).

18. P.20 L14; Compared for what?

Response: We compared the treatment of low N frequency with high N frequency. Similar comparisons were clarified throughout this section (P.22 L5-P.23 L7).

19. P.21 L14: Does this proportion reflect the S transformation? What is the definition of transformation rate in your study? This proportion may be affected by various factors such as mineralization rate, plant uptake, amount of adsorption material and soil chemistry. More detailed explanation is needed.

Response: We sincerely appreciate the valuable comments. After carefully considering this issue, we think it is not appropriate to define transformation rate as changes in the proportion of S fractions. Therefore, we re-plotted our data and changed the explanation into *“mowing resulted in significant decreases of inorganic S fractions and the proportion of total inorganic S relative to soil total S. In contrast, relative organic S proportion increased with mowing treatment, which indicates that mowing management removes soil S out of the ecosystem having a larger impact on inorganic S transformation rather than the organic S mineralization”* (P.23 L13-18).

20. Figure 6: It is difficult to understand which pair is compared and which letter corresponds.

Response: We feel sorry for the confusion. We have clarified it into “Different letters above the bars represent significant difference among means for the N addition frequency (F2 vs. F12) at  $15 \text{ g N m}^{-2} \text{ yr}^{-1}$  (N15) with and without mowing separately. No significant difference was detected between the two N frequencies at  $0 \text{ g N m}^{-2} \text{ year}^{-1}$  for both mown and unmown treatments (N0)” (P.43 L7-11).

21. Figure 7: This figure too small to see. The asterisk in blue column is hard to see.

Response: We divided the correlation heat map and SEM into two separated Figures (Figure 6 and Figure 7). We colored the asterisk in yellow to ensure it visible in both

red and blue columns.
